# Supplementary material for: Genome-wide analysis of BBX gene family in Tartary buckwheat (Fagopyrum tataricum)
Source: PeerJ. 2021 Aug 11;9:e11939. doi: 10.7717/peerj.11939 (PMC8364324; doi:10.7717/peerj.11939)
Supplement: Supplemental Information 2 [file peerj-09-11939-s002.xls]

## Sheet: Raw date for Figure 8B
The data for anthocyanin content
Sample		Weight （g, FW）	A530	A657	Anthocyanin content（mg/g, FW）
0 h	1	1.01456	0.2108	0.1088	0.180965
	2	1.01728	0.1972	0.1496	0.157086
	3	1.00551	0.1518	0.0924	0.127995
6 h	1	1.0225	0.21	0.02	0.200489
	2	0.995	0.21	0.04	0.201005
	3	1.0385	0.21	0	0.202215
12 h	1	1.001	0.34	0.01	0.337163
	2	0.9895	0.37	0.01	0.3714
	3	0.98	0.42	0.08	0.408163
24 h	1	1.021	1.02	0.03	0.991675
	2	1.02	1.05	0.05	1.01716
	3	1.017	1.08	0.02	1.05703
