# Supplementary material for: Genome-wide analysis of BBX gene family in Tartary buckwheat (Fagopyrum tataricum)
Source: PeerJ. 2021 Aug 11;9:e11939. doi: 10.7717/peerj.11939 (PMC8364324; doi:10.7717/peerj.11939)
Supplement: Supplemental Information 3 [file peerj-09-11939-s003.xlsx]

## Sheet: Raw data for Figure 9
Raw data for qRT-PCR anaalysis
Well	Fluor	Target	Cq
D07	0h	actin	15.68
D08	0h	actin	15.48
D09	0h	actin	15.56
D01	0h	BBX2	20.84
D02	0h	BBX2	20.95
D03	0h	BBX2	21.01
D04	0h	BBX3	23.07
D05	0h	BBX3	23.13
D06	0h	BBX3	23.37
D10	0h	BBX6	23.84
D11	0h	BBX6	23.97
D12	0h	BBX6	23.88
E07	6h	actin	16.43
E08	6h	actin	16.28
E09	6h	actin	16.37
E01	6h	BBX2	21.24
E02	6h	BBX2	21.36
E03	6h	BBX2	21.47
E04	6h	BBX3	22.26
E05	6h	BBX3	22.23
E06	6h	BBX3	22.55
E10	6h	BBX6	24.72
E11	6h	BBX6	24.84
E12	6h	BBX6	24.69
F07	12h	actin	16.76
F08	12h	actin	16.58
F09	12h	actin	16.69
F01	12h	BBX2	21.43
F02	12h	BBX2	21.36
F03	12h	BBX2	21.5
F04	12h	BBX3	22.6
F05	12h	BBX3	22.73
F06	12h	BBX3	22.79
F10	12h	BBX6	24.45
F11	12h	BBX6	24.71
F12	12h	BBX6	24.51
G07	24h	actin	17.09
G08	24h	actin	17.08
G09	24h	actin	16.94
G01	24h	BBX2	21.03
G02	24h	BBX2	21.06
G03	24h	BBX2	21.11
G04	24h	BBX3	22.03
G05	24h	BBX3	22.01
G06	24h	BBX3	22.1
G10	24h	BBX6	24.84
G11	24h	BBX6	24.71
G12	24h	BBX6	24.53
H07	48h	actin	18.55
H08	48h	actin	18.5
H09	48h	actin	18.49
H01	48h	BBX2	22.37
H02	48h	BBX2	22.52
H03	48h	BBX2	22.62
H04	48h	BBX3	22.33
H05	48h	BBX3	22.22
H06	48h	BBX3	22.2
H10	48h	BBX6	23.24
H11	48h	BBX6	23.35
H12	48h	BBX6	23.38
Well	sample	Target	Cq
F07	0h	actin	16.32
F08	0h	actin	16.18
F09	0h	actin	16.29
A01	0h	BBX8	28.52
A02	0h	BBX8	28.58
A03	0h	BBX8	28.61
A04	0h	BBX9	24.55
A05	0h	BBX9	24.63
A06	0h	BBX9	24.57
A07	0h	BBX10	32.3
A08	0h	BBX10	32.36
A09	0h	BBX10	32.28
A10	0h	BBX15	25.04
A11	0h	BBX15	25.12
A12	0h	BBX15	25.01
F01	0h	BBX17	21.8
F02	0h	BBX17	21.86
F03	0h	BBX17	21.73
G07	6h	actin	17.07
G08	6h	actin	16.89
G09	6h	actin	16.99
B01	6h	BBX8	24.55
B02	6h	BBX8	24.63
B03	6h	BBX8	24.58
B04	6h	BBX9	25.07
B05	6h	BBX9	25.1
B06	6h	BBX9	25.02
B07	6h	BBX10	30.77
B08	6h	BBX10	30.55
B09	6h	BBX10	30.6
B10	6h	BBX15	25.07
B11	6h	BBX15	25.14
B12	6h	BBX15	25.24
G01	6h	BBX17	22.36
G02	6h	BBX17	22.28
G03	6h	BBX17	22.31
H07	12h	actin	17.65
H08	12h	actin	17.53
H09	12h	actin	17.48
C01	12h	BBX8	24.48
C02	12h	BBX8	24.58
C03	12h	BBX8	24.46
C04	12h	BBX9	25.35
C05	12h	BBX9	25.4
C06	12h	BBX9	25.49
C07	12h	BBX10	32.64
C08	12h	BBX10	32.71
C09	12h	BBX10	32.58
C10	12h	BBX15	25.44
C11	12h	BBX15	25.62
C12	12h	BBX15	25.31
H01	12h	BBX17	22.6
H02	12h	BBX17	22.48
H03	12h	BBX17	22.5
F10	24h	actin	17.59
F11	24h	actin	17.47
F12	24h	actin	17.64
D01	24h	BBX8	23.33
D02	24h	BBX8	23.41
D03	24h	BBX8	23.54
D04	24h	BBX9	25.82
D05	24h	BBX9	25.92
D06	24h	BBX9	25.97
D07	24h	BBX10	30.89
D08	24h	BBX10	30.82
D09	24h	BBX10	30.78
D10	24h	BBX15	22.68
D11	24h	BBX15	22.68
D12	24h	BBX15	22.83
F04	24h	BBX17	23.83
F05	24h	BBX17	23.79
F06	24h	BBX17	23.8
G10	48h	actin	18.29
G11	48h	actin	18.12
G12	48h	actin	18.38
E01	48h	BBX8	24.5
E02	48h	BBX8	24.46
E03	48h	BBX8	24.56
E04	48h	BBX9	28.5
E05	48h	BBX9	28.82
E06	48h	BBX9	29.04
E07	48h	BBX10	32.21
E08	48h	BBX10	32.33
E09	48h	BBX10	32.29
E10	48h	BBX15	24.22
E11	48h	BBX15	24.28
E12	48h	BBX15	24.29
G04	48h	BBX17	25.34
G05	48h	BBX17	25.01
G06	48h	BBX17	25.05
Well	sample	Target	Cq
A01	0h	actin	16.44
A02	0h	actin	16.39
A03	0h	actin	16.36
A04	0h	BBX23	24.46
A05	0h	BBX23	24.6
A06	0h	BBX23	24.62
A07	0h	BBX24	21.78
A08	0h	BBX24	21.79
A09	0h	BBX24	21.82
A10	0h	BBX26	23.54
A11	0h	BBX26	23.64
A12	0h	BBX26	23.55
B01	6h	actin	17.35
B02	6h	actin	17.03
B03	6h	actin	17.18
B04	6h	BBX23	23.37
B05	6h	BBX23	23.26
B06	6h	BBX23	23.27
B07	6h	BBX24	20.97
B08	6h	BBX24	21.09
B09	6h	BBX24	21.13
B10	6h	BBX26	23.7
B11	6h	BBX26	23.81
B12	6h	BBX26	23.78
C01	12h	actin	17.61
C02	12h	actin	17.52
C03	12h	actin	17.52
C04	12h	BBX23	23.46
C05	12h	BBX23	23.61
C06	12h	BBX23	23.61
C07	12h	BBX24	21.63
C08	12h	BBX24	21.65
C09	12h	BBX24	21.66
C10	12h	BBX26	23.97
C11	12h	BBX26	23.97
C12	12h	BBX26	24.36
D01	24h	actin	17.88
D02	24h	actin	17.75
D03	24h	actin	17.68
D04	24h	BBX23	23.1
D05	24h	BBX23	23.08
D06	24h	BBX23	23.08
D07	24h	BBX24	20.49
D08	24h	BBX24	20.74
D09	24h	BBX24	20.68
D10	24h	BBX26	23.54
D11	24h	BBX26	23.7
D12	24h	BBX26	23.93
E01	48h	actin	18.72
E02	48h	actin	18.56
E03	48h	actin	18.72
E04	48h	BBX23	23.09
E05	48h	BBX23	23.05
E06	48h	BBX23	23.02
E07	48h	BBX24	21.36
E08	48h	BBX24	21.3
E09	48h	BBX24	21.17
E10	48h	BBX26	25.08
E11	48h	BBX26	25.22
E12	48h	BBX26	25.25
